# Supplementary material for: Magnetofluid-integrated biosensors based on DNase-dead Cas12a for visual point-of-care testing of HIV-1 by an up and down chip
Source: Royal Society of Chemistry journal article supplement (doi:10.1039/d3lc00558e), 2023-01-01
Supplement: d3lc00558e3.pdf [file d3lc00558e3.pdf]

## Supporting Information

### **Magnetofluid-Integrated Biosensors Based on DNase-dead Cas12a for Visual Point-of-Care Testing of HIV-1 by Up & Down Chip**

Di Huang,<sup>a,b</sup> Yekai Zhao<sup>a,b</sup>, Mengjun Fang,<sup>a,b</sup> Peijie Shen,<sup>a,b</sup> Hu Xu,<sup>a,b</sup> Yichen He,<sup>a,b</sup>  
Shengfu Chen,<sup>a,c</sup> Zhenjun Si<sup>d</sup>, Zhinan Xu<sup>a,b,\*</sup>

<sup>a</sup> *Key Laboratory of Biomass Chemical Engineering of Ministry of Education, College of Chemical and Biological Engineering, Zhejiang University, Hangzhou 310027, China.*

<sup>b</sup> *Institute of Biological Engineering, College of Chemical and Biological Engineering, Zhejiang University, Hangzhou 310027, China.*

<sup>c</sup> *Institute of Pharmaceutical Engineering, College of Chemical and Biological Engineering, Zhejiang University, Hangzhou 310027, China.*

<sup>d</sup> *Hangzhou FasTech Biotechnology Company Limited, Hangzhou 310005, China.*

\*Corresponding author:  
Prof. Zhinan Xu (znxu@zju.edu.cn)

## Table of Contents

|                                                                                             |    |
|---------------------------------------------------------------------------------------------|----|
| DNase-dead Cas12a expression and purification .....                                         | 3  |
| Enhanced green fluorescent protein expression and purification .....                        | 3  |
| Conventional CRISPR fluorescence reporting assay .....                                      | 3  |
| Table S1. Oligonucleotides used in this study .....                                         | 4  |
| Table S2. Sequences of the proteins used in this study .....                                | 4  |
| Table S3. Cutting power and speed of the laser cutting machine .....                        | 5  |
| Figure S1. Design concept of the up & down chip structure .....                             | 6  |
| Figure S2. Optimization of the migration efficiency of MBs .....                            | 7  |
| Figure S3. Structural and mutation site analysis of dCas12a. ....                           | 8  |
| Figure S4. Expression and characterization of dCas12a .....                                 | 8  |
| Figure S5. Feasibility characterization of detection using dCas12a-functionalized MBs ..... | 9  |
| Figure S6. Feasibility characterization of signal output based on image analysis .....      | 10 |
| Figure S7. Operation procedures of the image recognition APP. ....                          | 11 |
| Figure S8. Design of the homemade portable heating box .....                                | 12 |
| Figure S9. Alignment of HIV-1 gene sequences from different subtypes .....                  | 13 |
| Figure S10. Feasibility characterization of introducing PAM sites during RT-RAA .....       | 14 |
| Figure S11. Conservation of the binding and cleavage activities of Cas12a .....             | 15 |
| Figure S12. qRT-PCR assays for the comparison with the up & down chip .....                 | 16 |
| Table S4. Detection results of spiked samples .....                                         | 17 |
| Table S5. Cost analysis of different methods for HIV-1 diagnosis .....                      | 18 |

### **DNase-dead Cas12a expression and purification**

The DNase-dead Cas12a (dCas12a) variant utilized in this study was expressed heterologously in *E. coli* BL21 (DE3) from a codon-optimized synthetic gene and purified through a combination of Ni<sup>2+</sup>-affinity chromatography and ultrafiltration desalination. Specifically, the gene sequence was synthesized and inserted into the pET28a plasmid by ligation-independent cloning to generate a protein expression construct encoding the dCas12a polypeptide sequence (Table S2) fused with an N-terminal hexahistidine tag. When cultures were grown in Terrific Broth medium at 37 °C to an OD<sub>600 nm</sub> of 2.0, cells were induced by 0.1 mM isopropyl-1-thio-β-D-galactopyranoside (IPTG) and incubated at 18 °C for 8 h. The resulting cells were harvested by centrifugation, and the pellet was resuspended in Buffer A (20 mM Tris-HCl, 300 mM NaCl, 10 mM imidazole, pH 7.5). Then the cells were lysed via sonication, and the insoluble residues were removed through centrifugation. The clarified supernatant was applied to a column with Ni Sepharose (GE Healthcare) which was pre-equilibrated by Buffer A. After washing by 10 column volumes of Buffer B (20 mM Tris-HCl, 300 mM NaCl, 50 mM imidazole, pH 7.5) to remove nonspecifically bound proteins in the resin, the recombinant dCas12a eluted using Buffer C (20 mM Tris-HCl, 300 mM NaCl, 250 mM imidazole, pH 7.5). The obtained product was cleaned and desalted using a 100 kDa cutoff ultrafiltration membrane, and then the buffer was exchanged to Buffer D (40 mM Tris-HCl, 600 mM NaCl, 2 mM DTT, pH 7.5). Finally, the dCas12a solution was collected and concentrated to a final concentration of 10 μM and stored at -20 °C with the supplement of 50% glycerol.

### **Enhanced green fluorescent protein expression and purification**

The enhanced green fluorescent protein (EGFP) sequence can be found in Table S2, and its expression and purification protocol was carried out using the same method as described above.

### **Conventional CRISPR fluorescence reporting assay**

A 20 μL Cas12a fluorescence reporting system was consisted of 50 nM LbCas12a or dCas12a, 100 nM crRNA, 0.5 U/μL RNase inhibitor, 750 nM fluorescence reporter, 2 μL samples (ssDNA, dsDNA, or amplification products), and 1× NEBuffer 2.1. The mixture was transferred to a 384-well plate for reaction at 37 °C, and the fluorescence intensity was read every 3 min ( $\lambda_{\text{EX}}$ : 535 nm,  $\lambda_{\text{EM}}$ : 556 nm).

**Table S1.** Oligonucleotides used in this study

| Name                  | Sequences (5'-3')                                                 |
|-----------------------|-------------------------------------------------------------------|
| Mimic target-F        | ATTAGGGATTATGGAAAACAGATGGCAGGTGA<br>TGATTGTGTGGCAAGAAAACAG        |
| Mimic target-R        | CTGTTTTCTTGCCACACAATCATCACCTGCCAT<br>CTGTTTTCCATAATCCCTAAT        |
| Trans-F               | TAATACGACTCACTATAGGGTAATTTCTACTAA<br>GTGTAGATTTGCCACACAATCATCACCT |
| Trans-R               | AGGTGATGATTGTGTGGCAAATCTACACTTAGT<br>AGAAATTACCCTATAGTGAGTCGTATTA |
| HIV-1-crRNA           | UAAUUUCUACUAAGUGUAGAUUUGCCACACA<br>AUCAUCACCU                     |
| RT-RAA-FP             | Biotin-<br>TTTTCGGGTTTATTACAGGGACAGCAGAAA                         |
| RT-RAA-RP             | ATGTTCTAATCCTCATCCTGTCTACTTGCC                                    |
| RT-RAA-RP-PAM         | ATGTTCTAATCCTCATCCTGTTTCTTGCC                                     |
| qRT-PCR-FP            | ACAGCAGTACAAATGGC                                                 |
| qRT-PCR-RP            | TCCCTGTAATAAACCCGAAAAT                                            |
| qRT-PCR-Probe         | FAM-ATTGGGGGGGTACAGTGCAGGGGAA-MGB                                 |
| Fluorescence reporter | HEX-NNNNNNNNNNNN-BHQ <sub>1</sub>                                 |

\*PAM sites in the template strand or non-template strand of mimic target sequences were marked in blue.

\*Bases in the RT-RAA-RP that were subjected to mismatch design to introduce the PAM site were annotated in purple.

**Table S2.** Sequences of the proteins used in this study

| Name                              | Sequences (N-C)                                                                                                                                                                                                                                                                                                                                                                                                                                                                                                                                                                                                                                |
|-----------------------------------|------------------------------------------------------------------------------------------------------------------------------------------------------------------------------------------------------------------------------------------------------------------------------------------------------------------------------------------------------------------------------------------------------------------------------------------------------------------------------------------------------------------------------------------------------------------------------------------------------------------------------------------------|
| DNase-dead<br>Cas12a<br>(dCas12a) | HHHHHHSSGLVPRGSHMASMTGGQMGRGSEFMLK<br>NVGIDRLDVEKGRKNMSKLEKFTNCYSLSKTLRFKAIP<br>VGKTQENIDNKRLLEVEDEKRAEDYKGVKKLLDRYYL<br>SFINDVLHSIKLKNLNNYISLFRKKTRTEKENKELENLE<br>INLRKEIAKAFKGNELKSLFKKDIIETILPEFLDDKDEI<br>ALVNSFNGFTTAFTGFFDNRENMFSEEAKSTSIAFRCIN<br>ENLTRYISNMDIFEKVDIAIFDKHEVQEIKEKILNSDYDV<br>EDFFEGEFFNFVLTQEGIDVYNAIIGGFVTESGEKIKGL<br>NEYINLYNQKTKQKLPKFKPLYKQVLSDRSLSFYGE<br>GYTSDEEVLEVFRNTLNKNSEIFSSIKKLEKLFKNFDEY<br>SSAGIFVKNPASTISKDIFGEWNVIRDKWNAEYDDIH<br>LKKKAVVTEKYEDDRRKSFKKIGSFSLEQLQEYADAD<br>LSVVEKLKEIIIQKVDEIYKVYGSSEKLFDAFVLEKSL<br>KKNDVVAIMKDLLDSVKSFENYIKAFFGEGKETNRD<br>ESFYGDFVLAIDILLKVDHIYDAIRNYVTQPKYSKDKF |

|                                           |                                                                                                                                                                                                                                                                                                                                                                                                                                                                                                                                                                                                                                                                                                                                                                                                                                                          |
|-------------------------------------------|----------------------------------------------------------------------------------------------------------------------------------------------------------------------------------------------------------------------------------------------------------------------------------------------------------------------------------------------------------------------------------------------------------------------------------------------------------------------------------------------------------------------------------------------------------------------------------------------------------------------------------------------------------------------------------------------------------------------------------------------------------------------------------------------------------------------------------------------------------|
|                                           | <p> KLYFQNPQFMGGWDDKDKETDYRATILRYGSKYYLAI<br/> MDKKYAKCLQKIDKDDVNGNYEKINYKLLPGPNKML<br/> PKVFFSKKWMAYYNPSEDIQKIYKNGTFKKGDMFNL<br/> NDCHKLIDFFKDSISRYPKWSNAYDFNFSETEKYKDIA<br/> GFYREVVEEQGYKVSFESASKKEVDKLVVEGKLYMFQI<br/> YNKDFSDKSHGTPNLHTMYFKLLFDENNHGQIRLSGG<br/> AELFMRRASLKKEELVVHPANSPIANKNPDNPKTTT<br/> LSYDVYKDKRFSEDQYELHIPIAINKCPKNIFKINTEVR<br/> VLLKHDDNPYVIGIDRGERNLLYIVVVDGKGNIVEQYS<br/> LNEIINNFNIRIKTDYHSLDDKKEKERFEARQNWTSIE<br/> NIKELKAGYISQVVHKICELVEKYDAVIALADLNSGFK<br/> NSRVKVEKQVYQKFEKMLIDKLNVMVDKKSNPCATG<br/> GALKGYQITNKFESFKSMSTQNGFIFYIPAWLTSKIDPS<br/> TGFVNLLKTKYTSIADSKKFISSFDRIMYVPEEDLFEFA<br/> LDYKNFSRTDADYIKKWKLYSYGNRIRIFRNPKKNNV<br/> FDWEEVCLTSAYKELFNKYGINYQQGDIRALLCEQSD<br/> KAFYSSFMALMSLMLQMRNSITGRDVFDFLISPVKNS<br/> DGIFYDSRNYEAQENAILPKNADANGAYNIARKVLWA<br/> IGQFKKAEDEKLDKVKIAISNKEWLEYAQTSVKH </p> |
| Enhanced green fluorescent protein (EGFP) | <p> HHHHHHSSGLVPRGSHMASMTGGQQMGRGSMVSKG<br/> EELFTGVVPIVELDGDVNGHKFSVSGEGEGDATYGK<br/> LTLKFICTTGKLPVPWPTLVTTLTYGVCFSRYPDHMK<br/> QHDFFKSAMPEGYVQERTIFFKDDGNYKTRAEVKFEG<br/> DTLVNRIELKGIDFKEDGNILGHKLEYNYNSHNVYIMA<br/> DKQKNGIKVNFKIRHNIEDGSVQLADHYQQNTPIGDG<br/> PVLLPDNHYLSTQSALS KDPNEKRDHMLLEFVTAAG<br/> ITLGMDELYK </p>                                                                                                                                                                                                                                                                                                                                                                                                                                                                                                                           |

\*Protein sequence of dCas12a is annotated in yellow, with the E925A mutation site highlighted in red.

\*Protein sequence of EGFP is annotated in green.

**Table S3.** Cutting power and speed of the laser cutting machine

| PMMA layers           | Thickness (mm) | Cutting power (%) | Cutting speed (mm/s) |
|-----------------------|----------------|-------------------|----------------------|
| Top layer             | 0.5            | 10                | 20                   |
| 2 <sup>nd</sup> layer | 1.0            | 15                | 20                   |
| 3 <sup>rd</sup> layer | 2.0            | 20                | 20                   |
| Bottom layer          | 0.5            | 10                | 20                   |

\*Laser power of the equipment is 100 W.

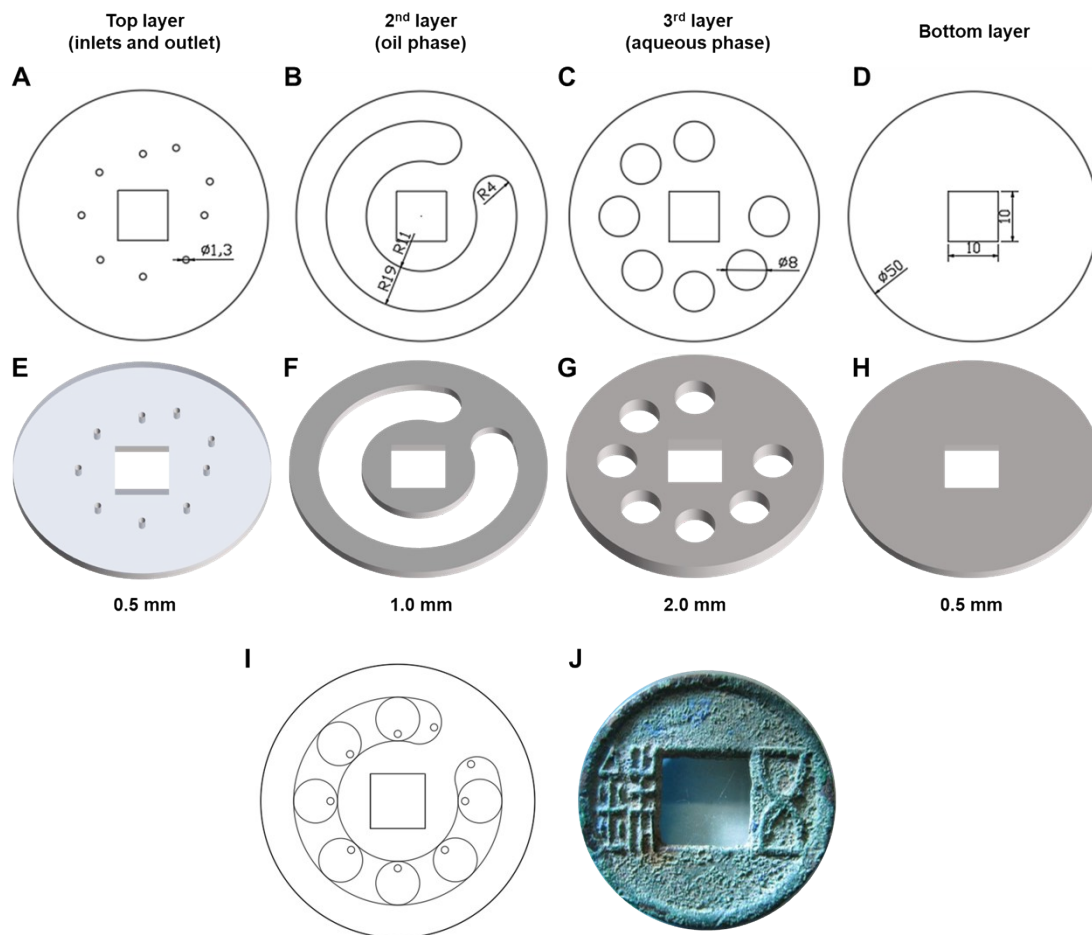

**Figure S1.** Design concept of the up & down chip structure. (A)-(D) Design diagrams of the top layer, 2<sup>nd</sup> layer, 3<sup>rd</sup> layer, and bottom layer in the up and down chip. (E)-(F) model diagrams of each layer in the up and down chip. (I) Design diagram of the up and down chip after assembling. (J) "A circular heaven and a square earth" design concept of the chip, resembling that of ancient Chinese coins.

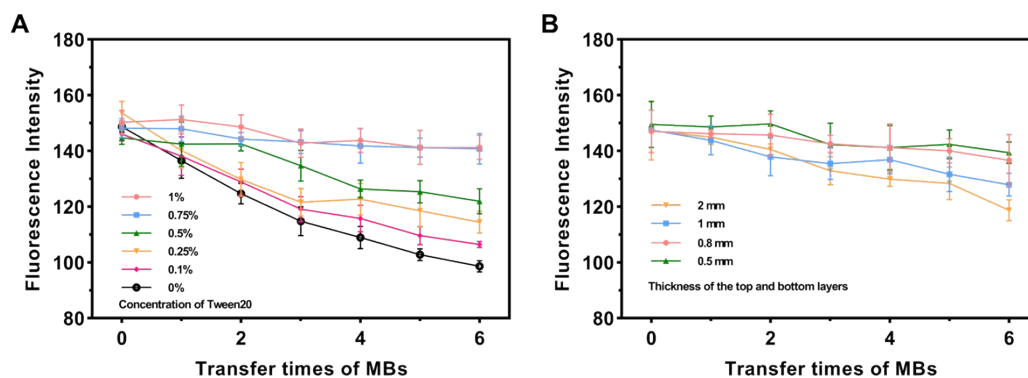

**Figure S2.** Optimization of the migration efficiency of MBs. (A) The impact of surfactant concentration on the migration efficiency of MBs. The migration efficiency improved with an increase in surfactant concentration. A moderate concentration of 0.75% was selected for subsequent practical use since excessively high concentrations could potentially affect the reaction. (With three technical replicates.) (B) The impact of the thicknesses of the top and bottom layers on the migration efficiency of MBs. A thickness of less than 1 mm for both layers resulted in an improvement in migration efficiency and 0.5 mm was selected for subsequent practical use. (With three technical replicates.)

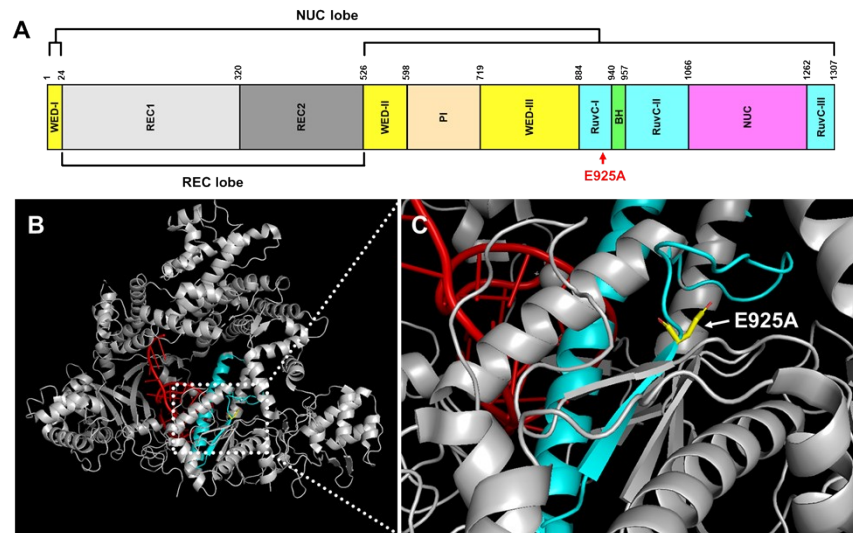

**Figure S3.** Structural and mutation site analysis of dCas12a. (A) Domain organization of dCas12a. (B), (C) Structural simulation of dCas12a with the E925A mutation site occurred in the RuvC domain of the NUC lobe.

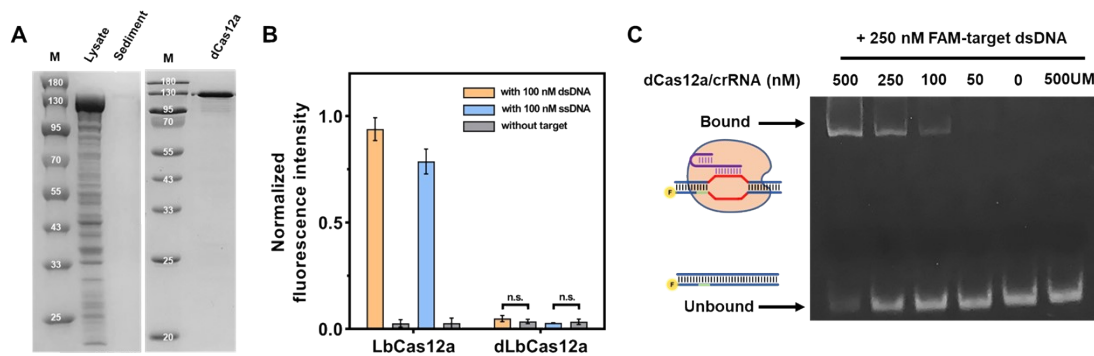

**Figure S4.** Expression and characterization of dCas12a. (A) SDS-PAGE characterization of dCas12a before and after purification. (B) Conventional CRISPR fluorescence reporting assay for characterizing the *trans*-cleavage activity of dCas12a. The mutated dCas12a no longer possessed the DNase-like activity mediated by crRNA. (With three technical replicates. “n.s.”: no significance in “Student’s t test”.) (C) Native PAGE characterization of the specific binding ability to target DNA of dCas12a. The mutated dCas12a still retained the ability to specifically recognize and bind target DNA mediated by crRNA.



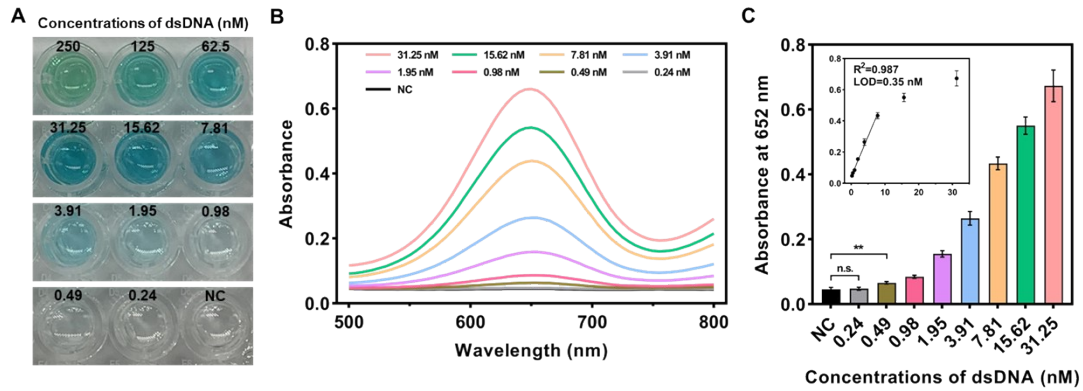

**Figure S5.** Feasibility characterization of nucleic acid detection using dCas12a-functionalized MBs. (A) Response of color changes vs. different concentrations of target dsDNA by dCas12a-functionalized MBs. The color change directly visible to the naked eye was observed at 0.98 nM target dsDNA. (B) Full-wavelength scans of each reaction group showed a maximum absorption peak at 652 nm. (C) Response of the absorption values at 652 nm vs. different concentrations of target dsDNA by dCas12a-functionalized magnetic beads. A color change that can be directly detected by a plate reader was observed at 0.49 nM target dsDNA. (\*\* $p < 0.01$ . “n.s.”: no significance in “Student’s t test”).

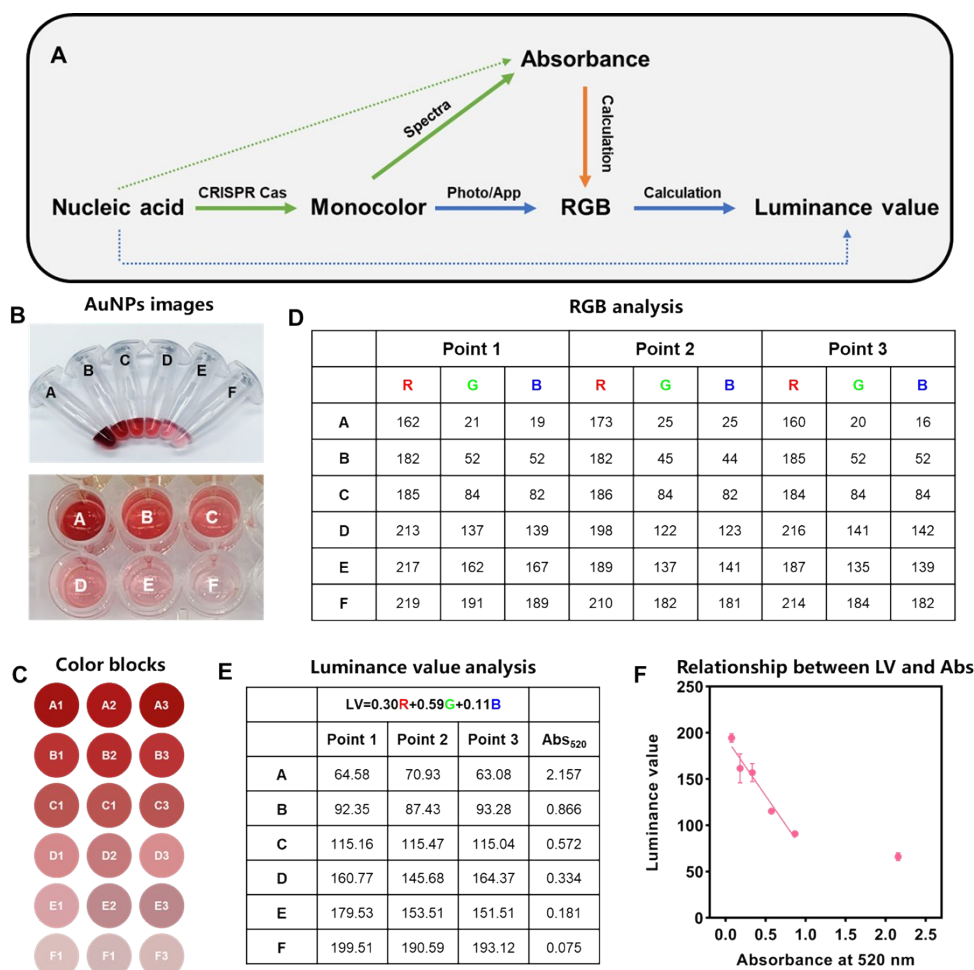

Figure S6. Feasibility characterization of signal output based on image analysis. (A) The basic principle of signal transduction and output. The monochlor signal generated by the CRISPR Cas detection system was converted into the RGB values by the image recognition APP and then converted into luminance values using the corresponding formula. (B) Images of different concentrations of AuNPs solution. (C) Color blocks extracted from the images of different concentrations of AuNPs solution. (D) RGB values extracted from the color blocks using the APP. (E) Calculation of the luminance values of the color blocks using the formula ( $LV = 0.30R + 0.59G + 0.11B$ ). (F) Correspondence between the luminance values and the absorbance of AuNPs at 520 nm, indicating the feasibility of using luminance analysis based on image recognition as a signal output method. (With three technical replicates.)

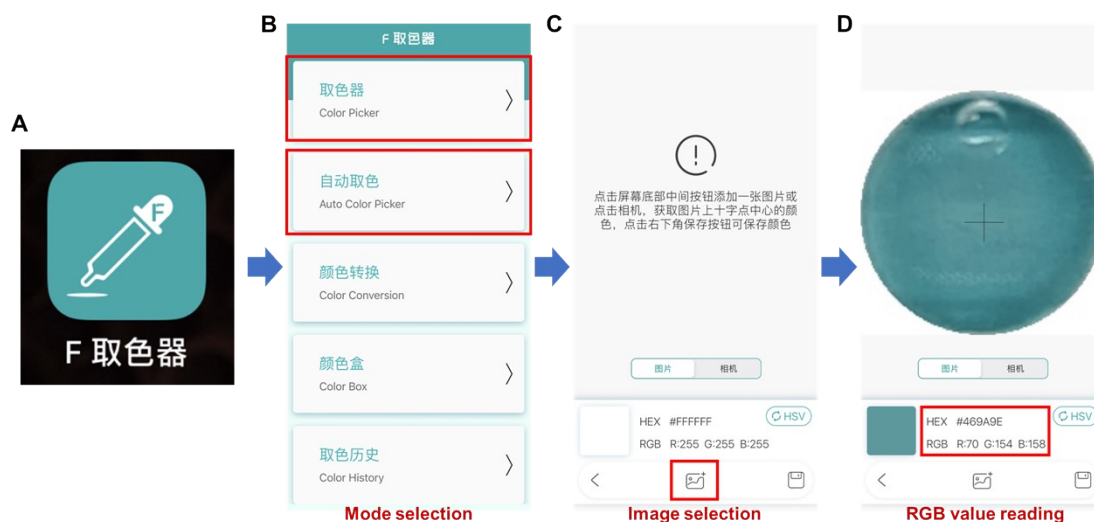

**Figure S7.** Operation procedures of the image recognition APP. (A) Free image recognition APP. (B) Selection of the color-picking method (manual or automatic). (C) Selection of the image to be recognized. (D) Reading of RGB values in the image color blocks.

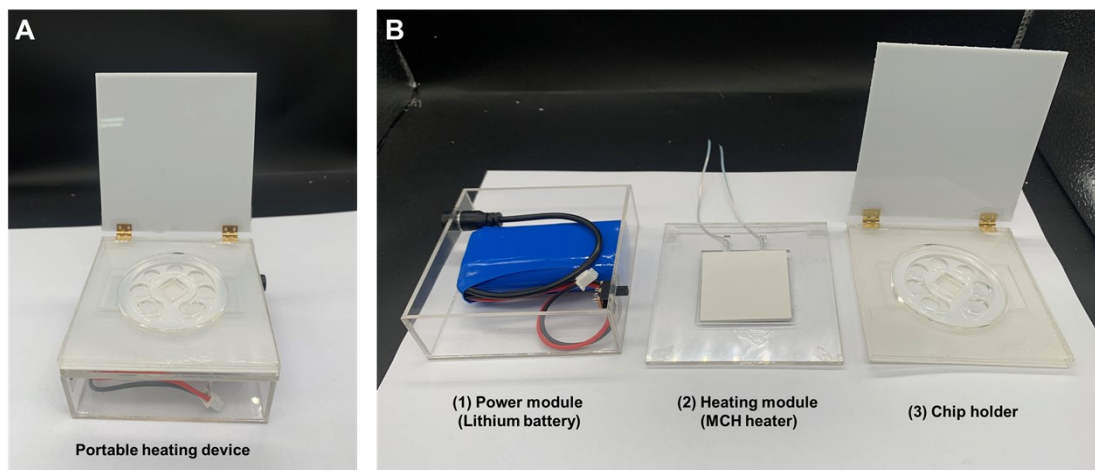

**Figure S8.** Design of the homemade portable heating box. (A) Image of the homemade portable heating box. (B) Disassembly of the structure of this heating box. It consisted of a power module, a heating module, and a chip holder.

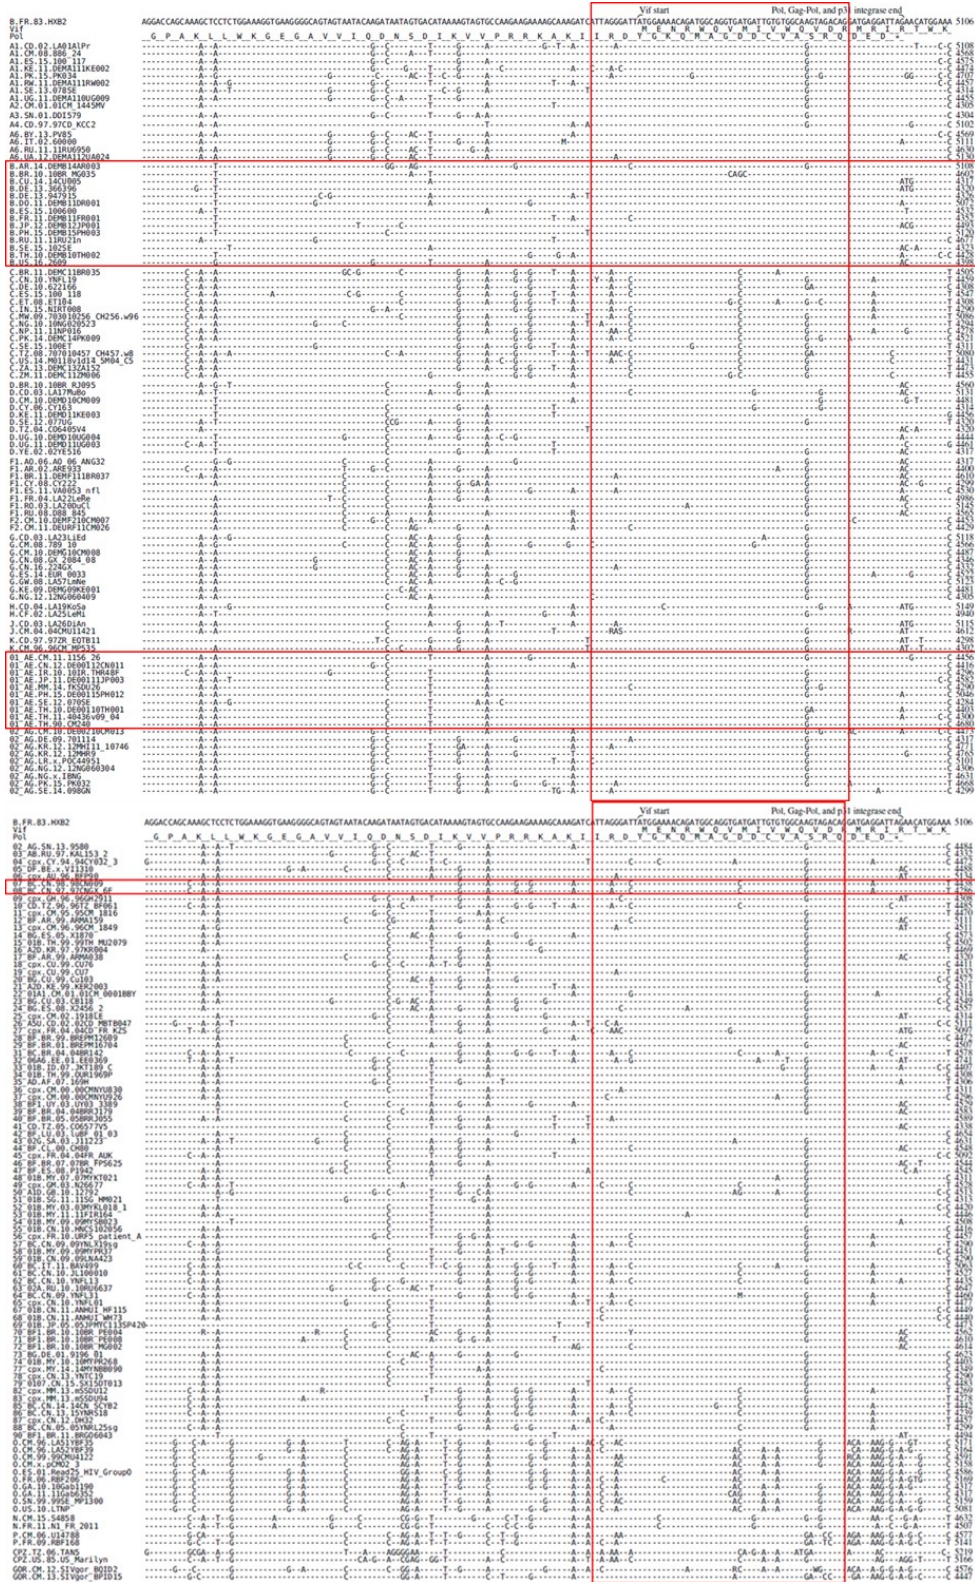

**Figure S9.** Alignment of HIV-1 genomic sequences from different subtypes (data from the Los Alamos National Laboratory). The relatively conserved gene segment of HIV-1 that we selected was framed by the long rectangle, and the currently prevalent HIV-1 subtypes were framed by the wide rectangle.

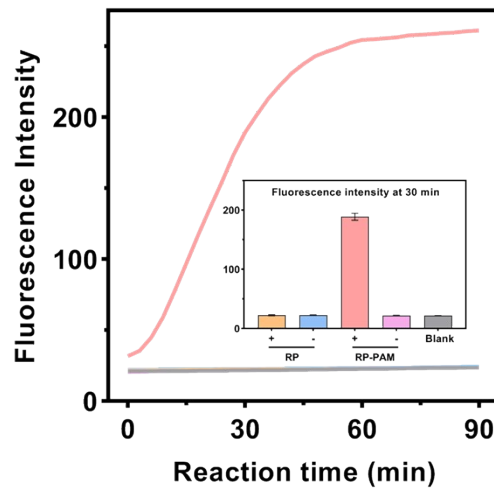

**Figure S10.** Feasibility characterization of introducing PAM sites during RT-RAA. Different RT-RAA amplification products were tested using the conventional CRISPR fluorescence reporting assay. Only the RP-PAM amplification product produced a significant fluorescent signal in the detection, as it caused some bases in the characteristic fragment to be replaced during the amplification process, forming an artificial PAM site for the recognition by Cas12a. (With three technical replicates.)

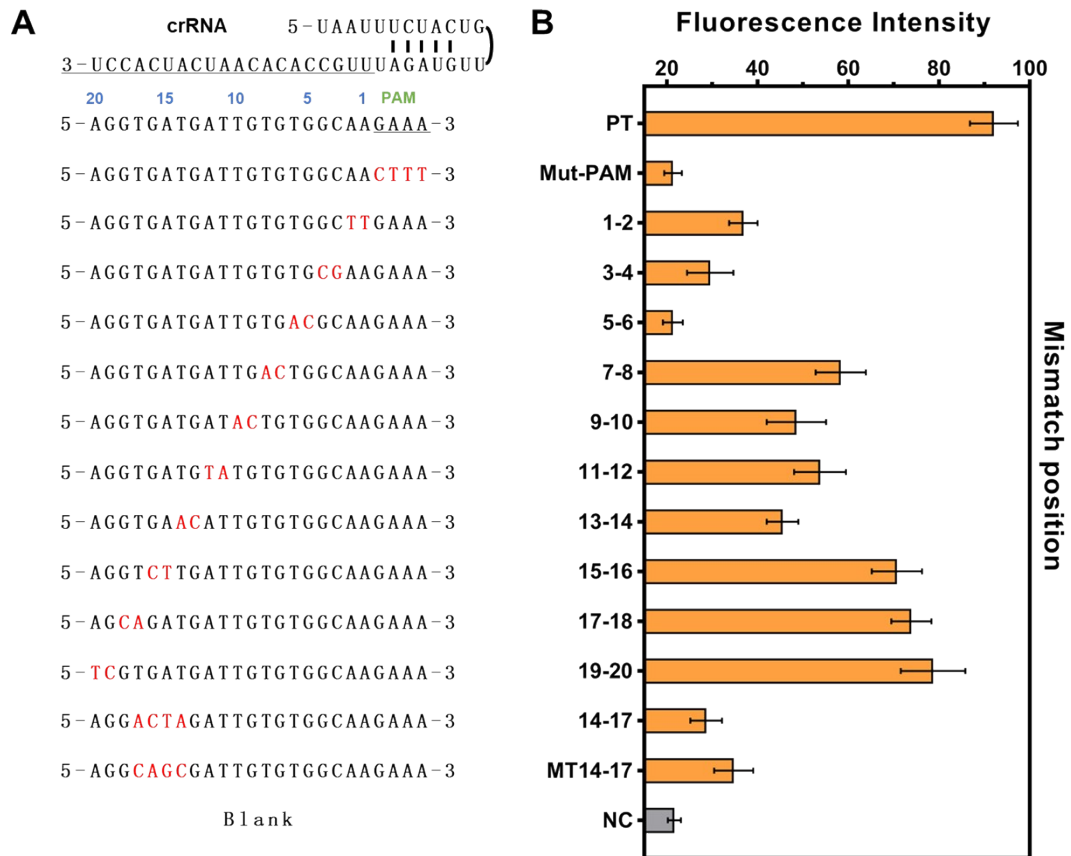

**Figure S11.** Conservation of the binding and cleavage activities of Cas12a. (A) Mismatches between the crRNA and dsDNA. (B) Fluorescent signals generated by each target dsDNA in the conventional CRISPR fluorescence reporting assay. (With three technical replicates.) Mismatches between the crRNA and dsDNA target affected the binding ability of Cas12a, resulting in a slowed *trans*-cleavage rate, with a greater impact caused by PAM mutations or mismatches in the PAM-adjacent “seed region”.

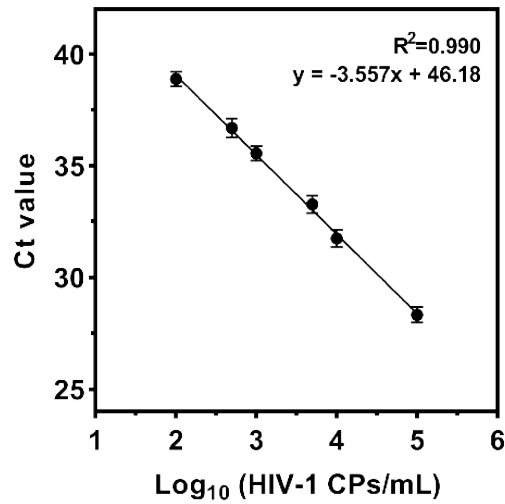

**Figure S12.** qRT-PCR assays for the comparison with the up & down chip. A qRT-PCR system for HIV-1 using primers and probe according to the National Guideline for Detection of HIV/AIDS (2020) was established to investigate the detection accuracy of the up & down chip. (The standard curve:  $Y = -3.557 \times \log_{10}(X) + 46.18$ ,  $R^2 = 0.990$ , Y: the Ct values; X: the concentrations of HIV-1 (CPs/mL)).



**Table S4.** Detection results of spiked samples

| No.             | Spiked (CPs/mL) | qRT-PCR  |        |        |         |                     |                   |                              | up & down chip |        |        |         |       |                              |
|-----------------|-----------------|----------|--------|--------|---------|---------------------|-------------------|------------------------------|----------------|--------|--------|---------|-------|------------------------------|
|                 |                 | Ct value |        |        |         | Calculated (CPs/mL) | Recovery (%)      | Diagnosis (P/N) <sup>a</sup> | Luminancevalue |        |        |         | ΔLV   | Diagnosis (P/N) <sup>b</sup> |
|                 |                 | Ct1      | Ct2    | Ct3    | Average |                     |                   |                              | LV1            | LV2    | LV3    | Average |       |                              |
| 1               | 800             | 36.257   | 35.809 | 35.711 | 35.926  | 763.590             | 95.4              | P                            | 187.88         | 185.88 | 193.70 | 189.15  | 16.96 | P                            |
| 2               | 0               | -        | -      | -      | -       | -                   | -                 | N                            | 203.78         | 206.78 | 207.00 | 205.85  | 0.26  | N                            |
| 3               | 900             | 35.827   | 35.209 | 36.204 | 35.747  | 857.400             | 95.3              | P                            | 184.70         | 178.50 | 187.06 | 183.42  | 22.69 | P                            |
| 4               | 6000            | 33.061   | 32.957 | 32.721 | 32.913  | 5368.198            | 89.5              | P                            | 163.22         | 156.22 | 165.22 | 161.55  | 44.56 | P                            |
| 5               | 300             | 37.452   | 37.166 | 37.829 | 37.482  | 278.757             | 92.9              | P                            | 201.80         | 195.10 | 199.50 | 198.80  | 7.31  | P                            |
| 6               | 600             | 36.598   | 36.011 | 36.638 | 36.416  | 556.037             | 92.7              | P                            | 196.40         | 199.50 | 198.10 | 198.00  | 8.11  | P                            |
| 7               | 0               | -        | -      | -      | -       | -                   | -                 | N                            | 205.22         | 207.22 | 208.45 | 206.96  | -0.85 | N                            |
| 8               | 0               | -        | -      | -      | -       | -                   | -                 | N                            | 203.78         | 205.22 | 209.08 | 206.03  | 0.09  | N                            |
| 9               | 400             | 37.249   | 37.461 | 36.925 | 37.212  | 332.139             | 83.0              | P                            | 194.48         | 198.57 | 196.09 | 196.38  | 9.73  | P                            |
| 10              | 0               | -        | -      | -      | -       | -                   | -                 | N                            | 206.78         | 204.67 | 204.96 | 205.47  | 0.64  | N                            |
| 11              | 0               | 43.891   | -      | -      | -       | -                   | -                 | N                            | 206.67         | 208.56 | 204.00 | 206.41  | -0.30 | N                            |
| 12              | 0               | -        | 43.347 | -      | -       | -                   | -                 | N                            | 205.88         | 206.00 | 205.58 | 205.82  | 0.29  | N                            |
| 13              | 0               | -        | -      | -      | -       | -                   | -                 | N                            | 206.40         | 208.99 | 206.22 | 207.20  | -1.09 | N                            |
| 14              | 750             | 36.225   | 36.004 | 35.874 | 36.034  | 711.721             | 94.9              | P                            | 192.30         | 177.70 | 196.00 | 188.67  | 17.45 | P                            |
| 15              | 1000            | 35.823   | 35.490 | 35.598 | 35.637  | 920.481             | 92.0              | P                            | 174.21         | 176.88 | 184.10 | 178.40  | 27.72 | P                            |
| 16              | 0               | -        | -      | -      | -       | -                   | -                 | N                            | 206.78         | 208.78 | 204.11 | 206.56  | -0.44 | N                            |
| 17              | 5000            | 33.408   | 32.979 | 32.909 | 33.099  | 4760.263            | 95.2              | P                            | 161.81         | 167.52 | 163.22 | 164.18  | 41.93 | P                            |
| 18              | 0               | -        | -      | -      | -       | -                   | -                 | N                            | 208.30         | 206.18 | 203.99 | 206.16  | -0.04 | N                            |
| 19              | 500             | 36.904   | 36.887 | 36.480 | 36.757  | 445.803             | 89.2              | P                            | 196.50         | 201.67 | 197.08 | 198.42  | 7.70  | P                            |
| 20              | 0               | -        | -      | -      | -       | -                   | -                 | N                            | 207.78         | 205.60 | 209.00 | 207.46  | -1.35 | N                            |
| 21              | 3000            | 33.987   | 33.512 | 34.187 | 33.895  | 2842.232            | 94.7              | P                            | 161.11         | 176.30 | 172.92 | 170.11  | 36.00 | P                            |
| 22              | 0               | -        | -      | -      | -       | -                   | -                 | N                            | 208.00         | 205.82 | 206.22 | 206.68  | -0.57 | N                            |
| 23              | 0               | -        | 43.233 | -      | -       | -                   | -                 | N                            | 208.31         | 208.78 | 206.78 | 207.96  | -1.84 | N                            |
| 24              | 6000            | 32.857   | 32.492 | 33.251 | 32.867  | 5531.647            | 92.2              | P                            | 162.73         | 166.72 | 162.02 | 163.82  | 42.29 | P                            |
| 25              | 7000            | 32.342   | 32.876 | 32.703 | 32.640  | 6404.495            | 91.5              | P                            | 158.32         | 162.73 | 165.32 | 162.12  | 43.99 | P                            |
| 26              | 0               | -        | -      | -      | -       | -                   | -                 | N                            | 205.22         | 206.58 | 204.00 | 205.27  | 0.85  | N                            |
| 27              | 7500            | 32.270   | 32.405 | 32.751 | 32.475  | 7126.434            | 95.0              | P                            | 162.28         | 158.41 | 159.61 | 160.10  | 46.01 | P                            |
| 28              | 0               | -        | -      | -      | -       | -                   | -                 | N                            | 206.07         | 207.38 | 206.78 | 206.74  | -0.63 | N                            |
| 29              | 1000            | 35.302   | 35.997 | 35.714 | 35.671  | 900.443             | 90.0              | P                            | 178.88         | 179.48 | 172.70 | 177.02  | 29.09 | P                            |
| 30              | 0               | -        | -      | -      | -       | -                   | -                 | N                            | 204.45         | 207.00 | 208.78 | 206.74  | -0.63 | N                            |
| 31              | 0               | 42.962   | -      | -      | -       | -                   | -                 | N                            | 204.00         | 205.11 | 204.89 | 204.67  | 1.45  | N                            |
| 32 <sup>d</sup> | 250             | 38.089   | 37.521 | 37.749 | 37.786  | 228.960             | 91.6              | P                            | 202.99         | 201.74 | 202.81 | 202.51  | 3.60  | N                            |
| 33              | 5000            | 33.183   | 33.225 | 32.874 | 33.094  | 4774.665            | 95.5              | P                            | 162.04         | 175.22 | 156.93 | 164.73  | 41.38 | P                            |
| 34              | 0               | -        | -      | -      | -       | -                   | -                 | N                            | 202.00         | 206.78 | 204.74 | 204.51  | 1.61  | N                            |
| 35              | 100000          | 28.578   | 28.741 | 28.384 | 28.568  | 89424.644           | 89.4              | P                            | 148.37         | 143.78 | 153.75 | 148.63  | 57.48 | P                            |
| 36              | 0               | -        | -      | -      | -       | -                   | -                 | N                            | 205.60         | 206.78 | 204.67 | 205.68  | 0.43  | N                            |
| 37              | 10000           | 31.967   | 31.872 | 32.370 | 32.070  | 9266.584            | 92.7              | P                            | 156.05         | 155.93 | 156.44 | 156.14  | 49.97 | P                            |
| 38              | 0               | -        | 43.721 | -      | -       | -                   | -                 | N                            | 205.78         | 204.67 | 204.33 | 204.93  | 1.19  | N                            |
| 39              | 0               | -        | -      | -      | -       | -                   | -                 | N                            | 206.78         | 207.07 | 204.67 | 206.17  | -0.06 | N                            |
| 40              | 8000            | 32.514   | 32.281 | 32.647 | 32.481  | 7101.873            | 88.8              | P                            | 159.58         | 161.85 | 160.40 | 160.61  | 45.50 | P                            |
| 41              | 0               | -        | -      | -      | -       | -                   | -                 | N                            | 207.22         | 206.40 | 207.93 | 207.18  | -1.07 | N                            |
| 42              | 2500            | 34.025   | 34.483 | 34.457 | 34.322  | 2156.760            | 86.3              | P                            | 178.72         | 176.42 | 173.82 | 176.32  | 29.79 | P                            |
| 43              | 700             | 36.141   | 35.802 | 36.270 | 36.071  | 695.027             | 99.3              | P                            | 184.48         | 188.20 | 176.90 | 183.19  | 22.92 | P                            |
| 44              | 0               | -        | -      | -      | -       | -                   | -                 | N                            | 206.07         | 206.40 | 205.00 | 205.82  | 0.29  | N                            |
| 45              | 600             | 36.215   | 36.552 | 36.539 | 36.435  | 549.003             | 91.5              | P                            | 189.18         | 190.66 | 192.08 | 190.64  | 15.47 | P                            |
| 46              | 2000            | 34.586   | 34.418 | 34.820 | 34.608  | 1791.857            | 89.6              | P                            | 176.80         | 175.02 | 178.72 | 176.85  | 29.27 | P                            |
| 47              | 0               | -        | -      | -      | -       | -                   | -                 | N                            | 203.89         | 201.78 | 204.18 | 203.28  | 2.83  | N                            |
| 48              | 300             | 37.417   | 37.656 | 37.483 | 37.519  | 272.277             | 90.8              | P                            | 197.43         | 199.46 | 201.28 | 199.39  | 6.72  | P                            |
| 49              | 0               | 42.065   | -      | -      | -       | -                   | -                 | N                            | 204.78         | 204.89 | 203.78 | 204.48  | 1.63  | N                            |
| 50              | 0               | -        | -      | -      | -       | -                   | -                 | N                            | 203.99         | 208.31 | 207.60 | 206.63  | -0.52 | N                            |
| 51              | 1000000         | 25.085   | 25.124 | 25.539 | 25.249  | 766230.577          | 76.6 <sup>c</sup> | P                            | 147.32         | 146.05 | 146.87 | 146.75  | 59.37 | P                            |
| 52              | 0               | -        | -      | -      | -       | -                   | -                 | N                            | 205.71         | 207.00 | 208.78 | 207.16  | -1.05 | N                            |
| 53              | 0               | -        | 43.775 | -      | -       | -                   | -                 | N                            | 207.82         | 204.78 | 206.89 | 206.50  | -0.38 | N                            |
| 54              | 9000            | 32.976   | 31.801 | 32.064 | 32.280  | 8085.256            | 89.8              | P                            | 159.13         | 159.81 | 156.99 | 158.64  | 47.47 | P                            |
| 55              | 10000           | 32.551   | 31.780 | 31.891 | 32.074  | 9240.627            | 92.4              | P                            | 158.71         | 161.28 | 158.70 | 159.56  | 46.55 | P                            |
| 56              | 0               | -        | -      | 42.684 | -       | -                   | -                 | N                            | 208.67         | 204.78 | 206.97 | 206.81  | -0.69 | N                            |

<sup>a</sup> Judged as “Negative” when the Ct value was larger than 42 or undetected.

<sup>b</sup> Average ΔLV (6.08) of the negative control signal plus three times the standard deviation was set as the cut-off line for diagnosis. Judged as “Positive” when the ΔLV was larger than this cut-off line.

<sup>c</sup> Reason for the low recovery rate of sample 51 was that its concentration was outside the dynamic detection range of qRT-PCR, thereby preventing its effective quantification.

<sup>d</sup> Regarding sample 32, two detection methods exhibited different results, and the reasons for this discrepancy were discussed in the main text.



**Table S5.** Cost analysis of different methods for HIV-1 diagnosis

|   | Method         | Manufacturer           | Reagents cost (\$/sample)                                                               | Consumables cost (\$/sample) | Total cost without instruments (\$/sample) | Instruments/ device cost (\$)                     |
|---|----------------|------------------------|-----------------------------------------------------------------------------------------|------------------------------|--------------------------------------------|---------------------------------------------------|
| 1 | qRT-PCR        | Thermo Fisher/ TsingKe | Pretreatment kit (2.75) + qRT-PCR kit (5.50) + primers and probe (2.06) = 10.31         | 1.11                         | 11.42                                      | qRT-PCR thermocycler (> 30000.00)                 |
| 2 | Up & down chip | Our assay              | Pretreatment kit (2.75) + RT-RAA kit (2.75) + dCas12a-MBs (1.10) + others (2.50) = 9.10 | 1.37                         | 10.47                                      | Heating box (1.10) + smartphone (275.00) = 276.10 |
